# Supplementary material
Source: MDPI journal article supplement (https://www.mdpi.com/1996-1073/16/8/3473)
Supplement: s1 [file s1]

## General optimization model of wood procurement

$$\begin{aligned}
 Min\ MTC = [ & \sum_{a=1}^A \sum_{b=1}^B \sum_{d=1}^D (c1x1_{abd}X1_{abd} \times (1 + i^{-13})^d) \\
 & + \sum_{a=1}^A \sum_{b=1}^B \sum_{d=1}^D ((c1x1_{abd} + c2x2_{abd})X2_{abd} \times (1 + i^{-13})^d) \\
 & + \sum_{a=1}^A \sum_{b=1}^B \sum_{c=1}^C \sum_{d=1}^D ((c1x3_{abcd} + c2x3_{abcd})X3_{abcd} \times (1 + i^{-13})^d) \\
 & + \sum_{a=1}^A \sum_{b=1}^B \sum_{d=1}^D ((c1x4_{abd} + c2x4_{abd})X4_{abd} \times (1 + i^{-13})^d) \\
 & + \sum_{a=1}^A \sum_{b=1}^B \sum_{c=1}^C \sum_{d=1}^D ((c1x5_{abcd} + c2x5_{abcd})X5 \times (1 + i^{-13})^d) \\
 & + \sum_{a=1}^A \sum_{c=1}^C \sum_{d=1}^D (cx6_{acd}X6_{acd} \times (1 + i^{-13})^d) \\
 & + \sum_{a=1}^A \sum_{b=1}^B \sum_{d=1}^D (cx7_{abd}X7_{abd} \times (1 + i^{-13})^d) + \sum_{a=1}^A \sum_{c=1}^C \sum_{d=1}^D (cx8_{acd}X8_{acd} \times (1 \\
 & + i^{-13})^d) + \sum_{a=1}^A \sum_{b=1}^B \sum_{d=1}^D (cx9_{abd}X9_{abd} \times (1 + i^{-13})^d) ]
 \end{aligned}$$

*Subject to*

$$X1_{abd} + X2_{abd} \geq X1max_{abd}$$

$$X1_{abd} \leq X1max_{abd}$$

$$X7_{abd-1} + X4_{abd} - X3_{abcd} - X5_{abcd} = X7_{abd}$$

$$X7_{abd=12} \leq X7E_{ab}$$

$$X7_{abd=0} = X7B_{ab}$$

$$X8_{acd-1} + X3_{abcd} + X5_{abcd} - D_{acd} = X8_{acd}$$

$$X8_{acd-1} + X3_{abcd} + X5_{abcd} \geq X10_{acd}$$

$$X8_{acd} \geq X8min_{acd}$$

$$X8_{acd} \leq X8max_{acd}$$

$$X8_{acd=12} \leq X8E_{ac}$$

$$X8_{acd=0} = X8B_c$$

$$X9_{abd-1} + X1_{abd} + X2_{abd} - X4_{abd} = X9_{abd}$$

$$X9_{abd=12} \leq X9E_{ab}$$

$$X9_{abd=0} = X9B_{ab}$$

$$X1_{abd}; X2_{abd}; X3_{abcd}; X4_{abd}; X5_{abcd}; X6_{acd}; X7_{abd}; X8_{acd}; X9_{abd} \geq 0$$

Where:

MTC = minimum total wood procurement costs (€),

Activities:

$X1_{abd}$  = Cubic meters of environmentally sustainable timber a purchased in region b for month d,

$X2_{abd}$  = Cubic meters of environmentally non-sustainable timber a purchased in region b for month d,

$X3_{abcd}$  = Cubic meters of timber a transported from region b to plant c for month d,

$X4_{abd}$  = Cubic meters of timber a harvested in region b for month d,

$X5_{abcd}$  = Cubic meters of timber a chipped in region b to plant n at month d,

$X6_{acd}$  = Cubic meters of timber a chipped at plant c at month d,

$X7_{abd}$  = Cubic meters of timber a in roadside storage in region b at month d,

$X8_{acd}$  = Cubic meters of timber a in plant storage c at month d,

$X9_{abd}$  = Cubic meters of timber a in stand storage in region b at month d,

$X10_{acd}$  = Cubic meters of timber a required at plant c at month d,

Operation costs:

$c1x1_{abd}$  = purchasing cost (€m<sup>-3</sup>) of environmentally sustainable timber a from region m at month d,

$c1x3_{abcd}$  = transportation costs (€m<sup>-3</sup>) of timber a from region b to plant c at month d,

$c1x4_{abd}$  = harvesting cost (€m<sup>-3</sup>) for timber a from region b at month d,

$c1x5_{abcd}$  = chipping and transport cost (€m<sup>-3</sup>) of timber a from region b to plant c at month d,

$cx6_{acd}$  = chipping cost (€m<sup>-3</sup>) of timber a at plant c at month d,

$cx7_{acd}$  = storage cost (€m<sup>-3</sup>) of timber a at roadside in region b at month d,

$cx8_{acd}$  = storage cost (€m<sup>-3</sup>) of timber a at plant n at month d,

$cx9_{acd}$  = storage cost (€m<sup>-3</sup>) of timber a in stand storage in region b at month d,

CO<sub>2</sub> emission allowance costs:

$c2x2_{abd}$  = CO<sub>2</sub> cost (€m<sup>-3</sup>) of environmentally non-sustainable timber a from region b at month d,

$c2x3_{abcd}$  = CO<sub>2</sub> cost (€m<sup>-3</sup>) of fossil fuel for transport timber a from region c to plant c at month d,

$c2x4_{abd}$  = CO<sub>2</sub> cost (€m<sup>-3</sup>) of fossil fuel for harvesting timber a from region b at month d,

$c2x5_{abcd}$  = CO<sub>2</sub> cost (€m<sup>-3</sup>) of fossil fuel for chipping and transport timber a from region b to plant c at month d,

Constraints:

$X1_{max_{abd}}$  = maximum cubic meters of sustainable harvesting of timber a in region b at month d,

$X3_{max_{ab}}$  = maximum cubic meters of timber a transported from region b,

$X3_{min_{ab}}$  = minimum cubic meters of timber a transported from region b,

$X4_{max_{abd}}$  = maximum cubic meters of timber a harvested from region b at month d,

$X4_{min_{abd}}$  = minimum cubic meters of timber a harvested from region b at month d,

$X7B_{ab}$  = Cubic meters of timber a by roadside in region b at the beginning of year,

$X7E_{ab}$  = Cubic meters of timber a by roadside in region b at the end of year,

$X8B_{ac}$  = Cubic meters of timber a in storage at plant c at the beginning of year,

$X8E_{ac}$  = Cubic meters of timber a in storage at plant c at the end of year,

$X8_{max_{acd}}$  = maximum cubic meters of timber a in storage at plant c at month d,

$X8min_{acd}$  = minimum cubic meters of timber a in storage at plant c at month d,  
 $X9BI_{ab}$  = Cubic meters ( $m^3$ ) of timber a in stand storage at region b at the beginning of year,  
 $X9E_{ab}$  = Cubic meters ( $m^3$ ) of timber a in stand storage at region b at the end of year,  
 $X9max_{abd}$  = maximum cubic meters of timber a in stand storage at region b at month d,  
 $X9min_{abd}$  = minimum cubic meters of timber a in stand storage at region b at month d,  
 $X10max_{acd}$  = maximum cubic meters of timber a required at plant c at month d,  
 $X10min_{acd}$  = minimum cubic meters of timber a required at plant c at month d,  
 $i$  = annual interest (6%),  
 $A$  = timber assortments (1, ..., a, ..., 12),  
 $B$  = regions (1, ..., b, ..., 48),  
 $C$  = plants (1, ..., c, ..., 21),  
 $D$  = months (1, ..., d, ..., 12).
